# Supplementary material
Source: publisher figshare collection journal article supplement (https://acs.figshare.com/ndownloader/files/4338949)
Supplement: Supplementary file 1 [file 4338949]

data_1  
 
_audit_creation_method            SHELXL-97 
_chemical_name_systematic 
; 
 ? 
; 
_chemical_name_common             ? 
_chemical_melting_point           ? 
_chemical_formula_moiety          'C36 H24 Cu4 I2 N18 S4 W' 
_chemical_formula_sum 
 'C36 H24 Cu4 I2 N18 S4 W' 
_chemical_formula_weight          1528.85 
 
loop_ 
 _atom_type_symbol 
 _atom_type_description 
 _atom_type_scat_dispersion_real 
 _atom_type_scat_dispersion_imag 
 _atom_type_scat_source 
 'C'  'C'   0.0033   0.0016 
 'International Tables Vol C Tables 4.2.6.8 and 6.1.1.4' 
 'H'  'H'   0.0000   0.0000 
 'International Tables Vol C Tables 4.2.6.8 and 6.1.1.4' 
 'N'  'N'   0.0061   0.0033 
 'International Tables Vol C Tables 4.2.6.8 and 6.1.1.4' 
 'S'  'S'   0.1246   0.1234 
 'International Tables Vol C Tables 4.2.6.8 and 6.1.1.4' 
 'Cu'  'Cu'   0.3201   1.2651 
 'International Tables Vol C Tables 4.2.6.8 and 6.1.1.4' 
 'I'  'I'  -0.4742   1.8119 
 'International Tables Vol C Tables 4.2.6.8 and 6.1.1.4' 
 'W'  'W'  -0.8490   6.8722 
 'International Tables Vol C Tables 4.2.6.8 and 6.1.1.4' 
 'O'  'O'   0.0106   0.0060 
 'International Tables Vol C Tables 4.2.6.8 and 6.1.1.4' 
 
_symmetry_cell_setting            orthorhombic 
_symmetry_space_group_name_H-M    'Ccca' 
_symmetry_space_group_name_Hall   '-C 2b 2bc'
 
loop_ 
 _symmetry_equiv_pos_as_xyz 
 'x, y, z' 
 '-x+1/2, -y, z' 
 '-x, y, -z+1/2' 
 'x+1/2, -y, -z+1/2' 
 'x+1/2, y+1/2, z' 
 '-x+1, -y+1/2, z' 
 '-x+1/2, y+1/2, -z+1/2' 
 'x+1, -y+1/2, -z+1/2' 
 '-x, -y, -z' 
 'x-1/2, y, -z' 
 'x, -y, z-1/2' 
 '-x-1/2, y, z-1/2' 
 '-x+1/2, -y+1/2, -z' 
 'x, y+1/2, -z' 
 'x+1/2, -y+1/2, z-1/2' 
 '-x, y+1/2, z-1/2' 
 
_cell_length_a                    26.589(7) 
_cell_length_b                    31.767(8) 
_cell_length_c                    13.739(3) 
_cell_angle_alpha                 90.00 
_cell_angle_beta                  90.00 
_cell_angle_gamma                 90.00 
_cell_volume                      11604(5) 
_cell_formula_units_Z             8 
_cell_measurement_temperature     291(2) 
_cell_measurement_reflns_used     4735 
_cell_measurement_theta_min       2.11
_cell_measurement_theta_max       25.43 
 
_exptl_crystal_description        BLOCK 
_exptl_crystal_colour             'dark red'
_exptl_crystal_size_max           0.36 
_exptl_crystal_size_mid           0.28 
_exptl_crystal_size_min           0.24 
_exptl_crystal_density_meas       ? 
_exptl_crystal_density_diffrn     1.750
_exptl_crystal_density_method     'not measured' 
_exptl_crystal_F_000              5808.0
_exptl_absorpt_coefficient_mu     4.666 
_exptl_absorpt_correction_type    'multi-scan' 
_exptl_absorpt_correction_T_min   0.227 
_exptl_absorpt_correction_T_max   0.326
_exptl_absorpt_process_details    'SADABS; Bruker, 2000' 
 
_exptl_special_details 
; 
 ? 
; 
 
_diffrn_ambient_temperature       291(2) 
_diffrn_radiation_wavelength      0.71073 
_diffrn_radiation_type           'MoK\a'
_diffrn_radiation_source         'sealed tube'
_diffrn_radiation_monochromator  'graphite'
_diffrn_measurement_device_type  'Bruker Smart Apex CCD'
_diffrn_measurement_method       'phi and omega scans' 
_diffrn_detector_area_resol_mean  ? 
_diffrn_standards_number          ? 
_diffrn_standards_interval_count  ? 
_diffrn_standards_interval_time   ? 
_diffrn_standards_decay_%         ? 
_diffrn_reflns_number             29583 
_diffrn_reflns_av_R_equivalents   0.0502 
_diffrn_reflns_av_sigmaI/netI     0.0497 
_diffrn_reflns_limit_h_min        -32 
_diffrn_reflns_limit_h_max        24 
_diffrn_reflns_limit_k_min        -35 
_diffrn_reflns_limit_k_max        39 
_diffrn_reflns_limit_l_min        -16 
_diffrn_reflns_limit_l_max        11 
_diffrn_reflns_theta_min          1.79 
_diffrn_reflns_theta_max          26.00 
_reflns_number_total              5721 
_reflns_number_gt                 4400 
_reflns_threshold_expression      >2sigma(I) 
 
_computing_data_collection      'SMART (Bruker, 2000)'
_computing_cell_refinement      'SMART'
_computing_data_reduction       'SAINT (Bruker, 2000)'
_computing_structure_solution   'SHELXTL (Bruker, 2000)'
_computing_structure_refinement 'SHELXTL'
_computing_molecular_graphics   'SHELXTL'
_computing_publication_material 'SHELXTL'
 
_refine_special_details 
; 
 Refinement of F^2^ against ALL reflections.  The weighted R-factor wR and 
 goodness of fit S are based on F^2^, conventional R-factors R are based 
 on F, with F set to zero for negative F^2^. The threshold expression of 
 F^2^ > 2sigma(F^2^) is used only for calculating R-factors(gt) etc. and is 
 not relevant to the choice of reflections for refinement.  R-factors based 
 on F^2^ are statistically about twice as large as those based on F, and R- 
 factors based on ALL data will be even larger. 
; 
 
_refine_ls_structure_factor_coef  Fsqd  
_refine_ls_matrix_type            full 
_refine_ls_weighting_scheme       calc  
_refine_ls_weighting_details 
 'calc w=1/[\s^2^(Fo^2^)+(0.0790P)^2^+0.0000P] where P=(Fo^2^+2Fc^2^)/3' 
_atom_sites_solution_primary      direct 
_atom_sites_solution_secondary    difmap 
_atom_sites_solution_hydrogens    geom 
_refine_ls_hydrogen_treatment     CONSTR 
_refine_ls_extinction_method      none 
_refine_ls_extinction_coef        ? 
_refine_ls_number_reflns          5721 
_refine_ls_number_parameters      294 
_refine_ls_number_restraints      0 
_refine_ls_R_factor_all           0.0729 
_refine_ls_R_factor_gt            0.0490 
_refine_ls_wR_factor_ref          0.1298 
_refine_ls_wR_factor_gt           0.1223 
_refine_ls_goodness_of_fit_ref    1.038 
_refine_ls_restrained_S_all       1.038 
_refine_ls_shift/su_max           0.001 
_refine_ls_shift/su_mean          0.000 
 
loop_ 
 _atom_site_label 
 _atom_site_type_symbol 
 _atom_site_fract_x 
 _atom_site_fract_y 
 _atom_site_fract_z 
 _atom_site_U_iso_or_equiv 
 _atom_site_adp_type 
 _atom_site_occupancy 
 _atom_site_symmetry_multiplicity 
 _atom_site_calc_flag 
 _atom_site_refinement_flags 
 _atom_site_disorder_assembly 
 _atom_site_disorder_group 
C1 C 0.6955(3) 0.3972(2) 0.6516(5) 0.0313(16) Uani 1 1 d . . . 
H1 H 0.7087 0.4227 0.6303 0.038 Uiso 1 1 calc R . . 
C2 C 0.6994(3) 0.3602(2) 0.5941(6) 0.0354(18) Uani 1 1 d . . . 
H2 H 0.7167 0.3606 0.5353 0.042 Uiso 1 1 calc R . . 
C3 C 0.6777(3) 0.3243(2) 0.6262(6) 0.0353(18) Uani 1 1 d . . . 
C4 C 0.6542(3) 0.3203(2) 0.7147(6) 0.0349(17) Uani 1 1 d . . . 
H4 H 0.6418 0.2944 0.7352 0.042 Uiso 1 1 calc R . . 
C5 C 0.6492(3) 0.3557(2) 0.7727(6) 0.0423(19) Uani 1 1 d . . . 
H5 H 0.6317 0.3540 0.8311 0.051 Uiso 1 1 calc R . . 
C6 C 0.6777(3) 0.2874(3) 0.5645(7) 0.050(2) Uani 1 1 d . . . 
C7 C 0.6880(3) 0.2177(3) 0.4467(6) 0.0417(19) Uani 1 1 d . . . 
C8 C 0.6846(2) 0.1847(2) 0.3816(5) 0.0300(16) Uani 1 1 d . . . 
C9 C 0.7017(3) 0.1873(2) 0.2866(6) 0.0332(17) Uani 1 1 d . . . 
H9 H 0.7135 0.2131 0.2644 0.040 Uiso 1 1 calc R . . 
C10 C 0.7022(3) 0.1542(2) 0.2241(6) 0.0390(19) Uani 1 1 d . . . 
H10 H 0.7143 0.1574 0.1610 0.047 Uiso 1 1 calc R . . 
C11 C 0.6681(3) 0.1112(3) 0.3524(6) 0.0424(19) Uani 1 1 d . . . 
H11 H 0.6572 0.0852 0.3751 0.051 Uiso 1 1 calc R . . 
C12 C 0.6684(3) 0.1452(3) 0.4131(5) 0.0353(18) Uani 1 1 d . . . 
H12 H 0.6575 0.1419 0.4771 0.042 Uiso 1 1 calc R . . 
C13 C 0.6256(3) 0.5404(2) 0.9977(6) 0.0390(19) Uani 1 1 d . . . 
H13 H 0.6435 0.5159 0.9850 0.047 Uiso 1 1 calc R . . 
C14 C 0.5912(3) 0.5428(3) 1.0796(6) 0.045(2) Uani 1 1 d . . . 
H14 H 0.5871 0.5199 1.1208 0.054 Uiso 1 1 calc R . . 
C15 C 0.5659(3) 0.5781(3) 1.0950(6) 0.0409(19) Uani 1 1 d . . . 
C16 C 0.5697(3) 0.6132(2) 1.0323(6) 0.0419(19) Uani 1 1 d . . . 
H16 H 0.5504 0.6371 1.0431 0.050 Uiso 1 1 calc R . . 
C17 C 0.6038(3) 0.6111(2) 0.9517(6) 0.0397(19) Uani 1 1 d . . . 
H17 H 0.6072 0.6338 0.9092 0.048 Uiso 1 1 calc R . . 
C18 C 0.5356(4) 0.5798(3) 1.1778(5) 0.043(2) Uani 1 1 d . . . 
Cu1 Cu 0.67194(4) 0.44530(3) 0.83876(7) 0.0365(2) Uani 1 1 d . . . 
Cu2 Cu 0.68725(3) 0.56627(3) 0.83035(7) 0.0328(2) Uani 1 1 d . . . 
I1 I 0.591016(19) 0.432901(16) 0.93645(3) 0.03664(15) Uani 1 1 d . . . 
N1 N 0.6704(2) 0.39383(16) 0.7436(5) 0.0312(14) Uani 1 1 d . . . 
N2 N 0.6604(2) 0.24994(18) 0.5927(5) 0.0361(15) Uani 1 1 d . . . 
N3 N 0.6658(2) 0.2136(2) 0.5336(5) 0.0432(16) Uani 1 1 d . . . 
N4 N 0.7073(3) 0.2560(2) 0.4138(5) 0.0411(17) Uani 1 1 d . . . 
N5 N 0.7013(3) 0.2919(2) 0.4739(5) 0.0390(15) Uani 1 1 d . . . 
N6 N 0.6844(2) 0.1154(2) 0.2557(5) 0.0420(17) Uani 1 1 d . . . 
N7 N 0.6310(2) 0.57577(19) 0.9386(4) 0.0332(14) Uani 1 1 d . . . 
N8 N 0.5156(3) 0.5432(2) 1.2097(5) 0.0409(16) Uani 1 1 d . . . 
N9 N 0.5161(2) 0.61855(19) 1.2102(4) 0.0350(14) Uani 1 1 d . . . 
S1 S 0.68242(7) 0.50518(6) 0.74546(15) 0.0361(4) Uani 1 1 d . . . 
S2 S 0.75691(6) 0.55754(6) 0.92879(14) 0.0323(4) Uani 1 1 d . . . 
W1 W 0.7500 0.5000 0.83831(3) 0.02767(13) Uani 1 2 d S . . 
 
loop_ 
 _atom_site_aniso_label 
 _atom_site_aniso_U_11 
 _atom_site_aniso_U_22 
 _atom_site_aniso_U_33 
 _atom_site_aniso_U_23 
 _atom_site_aniso_U_13 
 _atom_site_aniso_U_12 
C1 0.042(4) 0.034(4) 0.017(3) 0.011(3) -0.011(3) -0.002(3) 
C2 0.032(4) 0.038(4) 0.037(4) -0.014(3) 0.014(3) 0.018(3) 
C3 0.040(4) 0.026(4) 0.040(4) -0.012(3) -0.023(3) 0.017(3) 
C4 0.036(4) 0.023(4) 0.045(5) -0.020(3) -0.012(3) -0.001(3) 
C5 0.046(4) 0.025(4) 0.055(5) 0.013(4) 0.011(4) 0.016(3) 
C6 0.032(4) 0.042(5) 0.074(6) -0.023(4) 0.022(4) -0.015(3) 
C7 0.043(4) 0.043(5) 0.039(5) -0.004(4) -0.016(4) 0.003(4) 
C8 0.021(3) 0.034(4) 0.035(4) -0.016(3) -0.006(3) 0.015(3) 
C9 0.032(4) 0.030(4) 0.038(4) 0.009(3) 0.017(3) 0.020(3) 
C10 0.037(4) 0.038(4) 0.042(5) -0.015(4) -0.006(3) 0.022(3) 
C11 0.049(5) 0.052(5) 0.026(4) -0.002(4) -0.010(3) 0.015(4) 
C12 0.031(4) 0.047(5) 0.028(4) 0.008(3) -0.013(3) 0.016(3) 
C13 0.036(4) 0.037(4) 0.043(4) 0.019(4) 0.009(3) 0.019(3) 
C14 0.041(4) 0.055(5) 0.040(5) -0.011(4) 0.029(4) -0.009(4) 
C15 0.056(5) 0.038(4) 0.029(4) -0.013(3) 0.015(4) -0.008(4) 
C16 0.051(5) 0.034(4) 0.041(4) 0.014(4) -0.024(4) -0.007(3) 
C17 0.062(5) 0.018(4) 0.039(4) 0.008(3) -0.013(4) -0.025(3) 
C18 0.068(6) 0.052(5) 0.010(3) -0.008(3) -0.011(3) 0.015(4) 
Cu1 0.0420(5) 0.0386(5) 0.0290(5) -0.0091(4) -0.0111(4) 0.0086(4) 
Cu2 0.0309(5) 0.0338(5) 0.0336(5) 0.0104(4) -0.0025(3) 0.0098(4) 
I1 0.0416(3) 0.0390(3) 0.0293(3) -0.0083(2) -0.0121(2) 0.0080(2) 
N1 0.044(3) 0.011(3) 0.039(3) 0.000(2) -0.012(3) -0.010(2) 
N2 0.048(4) 0.018(3) 0.042(4) 0.001(3) 0.018(3) 0.009(3) 
N3 0.040(4) 0.053(4) 0.037(4) -0.014(3) 0.015(3) -0.009(3) 
N4 0.045(4) 0.046(4) 0.033(3) 0.026(3) 0.006(3) 0.023(3) 
N5 0.055(4) 0.037(4) 0.025(3) -0.002(3) -0.008(3) -0.014(3) 
N6 0.047(4) 0.030(3) 0.049(4) -0.024(3) 0.007(3) -0.017(3) 
N7 0.037(3) 0.036(4) 0.026(3) 0.009(3) 0.011(2) 0.000(3) 
N8 0.053(4) 0.042(4) 0.028(3) 0.007(3) 0.017(3) 0.017(3) 
N9 0.041(3) 0.037(3) 0.027(3) 0.013(3) -0.004(3) 0.007(3) 
S1 0.0300(9) 0.0422(11) 0.0361(10) -0.0039(8) -0.0060(7) 0.0041(7) 
S2 0.0290(9) 0.0369(10) 0.0311(9) 0.0017(8) -0.0031(7) -0.0012(7) 
W1 0.0277(2) 0.0301(2) 0.0252(2) 0.000 0.000 0.01400(15) 
 
_geom_special_details 
; 
 All esds (except the esd in the dihedral angle between two l.s. planes) 
 are estimated using the full covariance matrix.  The cell esds are taken 
 into account individually in the estimation of esds in distances, angles 
 and torsion angles; correlations between esds in cell parameters are only 
 used when they are defined by crystal symmetry.  An approximate (isotropic) 
 treatment of cell esds is used for estimating esds involving l.s. planes. 
; 

loop_
  _platon_squeeze_void_nr
  _platon_squeeze_void_average_x
  _platon_squeeze_void_average_y
  _platon_squeeze_void_average_z
  _platon_squeeze_void_volume
  _platon_squeeze_void_count_electrons
  _platon_squeeze_void_content
   1  0.000 -0.001  0.000      1714       836 ' '
   2  0.500  0.237  0.265      1714       836 ' '
 
loop_ 
 _geom_bond_atom_site_label_1 
 _geom_bond_atom_site_label_2 
 _geom_bond_distance 
 _geom_bond_site_symmetry_2 
 _geom_bond_publ_flag 
C1 C2 1.420(10) . ? 
C1 N1 1.432(10) . ? 
C1 H1 0.9300 . ? 
C2 C3 1.352(11) . ? 
C2 H2 0.9300 . ? 
C3 C4 1.373(12) . ? 
C3 C6 1.446(11) . ? 
C4 C5 1.384(10) . ? 
C4 H4 0.9300 . ? 
C5 N1 1.395(9) . ? 
C5 H5 0.9300 . ? 
C6 N2 1.332(11) . ? 
C6 N5 1.403(11) . ? 
C7 N3 1.340(11) . ? 
C7 C8 1.381(11) . ? 
C7 N4 1.393(11) . ? 
C8 C9 1.384(10) . ? 
C8 C12 1.398(11) . ? 
C9 C10 1.359(10) . ? 
C9 H9 0.9300 . ? 
C10 N6 1.388(10) . ? 
C10 H10 0.9300 . ? 
C11 C12 1.363(11) . ? 
C11 N6 1.404(10) . ? 
C11 H11 0.9300 . ? 
C12 H12 0.9300 . ? 
C13 N7 1.392(9) . ? 
C13 C14 1.452(10) . ? 
C13 H13 0.9300 . ? 
C14 C15 1.323(12) . ? 
C14 H14 0.9300 . ? 
C15 C18 1.395(11) . ? 
C15 C16 1.412(11) . ? 
C16 C17 1.435(12) . ? 
C16 H16 0.9300 . ? 
C17 N7 1.347(10) . ? 
C17 H17 0.9300 . ? 
C18 N8 1.352(11) . ? 
C18 N9 1.407(10) . ? 
Cu1 N1 2.094(6) . ? 
Cu1 S2 2.262(2) 2_665 ? 
Cu1 S1 2.311(2) . ? 
Cu1 I1 2.5663(12) . ? 
Cu1 W1 2.7069(11) . ? 
Cu2 N6 1.961(6) 14_556 ? 
Cu2 N7 2.131(6) . ? 
Cu2 S1 2.268(2) . ? 
Cu2 S2 2.310(2) . ? 
Cu2 W1 2.6883(10) . ? 
N2 N3 1.418(9) . ? 
N4 N5 1.417(10) . ? 
N6 Cu2 1.961(6) 14_546 ? 
N8 N8 1.383(12) 3_657 ? 
N9 N9 1.390(12) 3_657 ? 
S1 W1 2.2098(19) . ? 
S2 W1 2.218(2) . ? 
S2 Cu1 2.262(2) 2_665 ? 
W1 S1 2.2098(19) 2_665 ? 
W1 S2 2.218(2) 2_665 ? 
W1 Cu2 2.6883(10) 2_665 ? 
W1 Cu1 2.7069(11) 2_665 ? 
 
loop_ 
 _geom_angle_atom_site_label_1 
 _geom_angle_atom_site_label_2 
 _geom_angle_atom_site_label_3 
 _geom_angle 
 _geom_angle_site_symmetry_1 
 _geom_angle_site_symmetry_3 
 _geom_angle_publ_flag 
C2 C1 N1 117.6(6) . . ? 
C2 C1 H1 121.2 . . ? 
N1 C1 H1 121.2 . . ? 
C3 C2 C1 119.0(7) . . ? 
C3 C2 H2 120.5 . . ? 
C1 C2 H2 120.5 . . ? 
C2 C3 C4 124.1(7) . . ? 
C2 C3 C6 119.6(8) . . ? 
C4 C3 C6 116.3(7) . . ? 
C3 C4 C5 118.6(7) . . ? 
C3 C4 H4 120.7 . . ? 
C5 C4 H4 120.7 . . ? 
C4 C5 N1 120.2(7) . . ? 
C4 C5 H5 119.9 . . ? 
N1 C5 H5 119.9 . . ? 
N2 C6 N5 120.2(7) . . ? 
N2 C6 C3 123.6(8) . . ? 
N5 C6 C3 115.9(7) . . ? 
N3 C7 C8 118.3(8) . . ? 
N3 C7 N4 122.5(8) . . ? 
C8 C7 N4 118.4(8) . . ? 
C7 C8 C9 122.9(8) . . ? 
C7 C8 C12 120.1(7) . . ? 
C9 C8 C12 116.5(7) . . ? 
C10 C9 C8 123.6(7) . . ? 
C10 C9 H9 118.2 . . ? 
C8 C9 H9 118.2 . . ? 
C9 C10 N6 119.0(7) . . ? 
C9 C10 H10 120.5 . . ? 
N6 C10 H10 120.5 . . ? 
C12 C11 N6 120.1(8) . . ? 
C12 C11 H11 119.9 . . ? 
N6 C11 H11 119.9 . . ? 
C11 C12 C8 121.5(7) . . ? 
C11 C12 H12 119.2 . . ? 
C8 C12 H12 119.2 . . ? 
N7 C13 C14 118.4(7) . . ? 
N7 C13 H13 120.8 . . ? 
C14 C13 H13 120.8 . . ? 
C15 C14 C13 119.2(8) . . ? 
C15 C14 H14 120.4 . . ? 
C13 C14 H14 120.4 . . ? 
C14 C15 C18 117.3(8) . . ? 
C14 C15 C16 122.3(8) . . ? 
C18 C15 C16 120.4(8) . . ? 
C15 C16 C17 118.7(8) . . ? 
C15 C16 H16 120.7 . . ? 
C17 C16 H16 120.7 . . ? 
N7 C17 C16 118.7(6) . . ? 
N7 C17 H17 120.7 . . ? 
C16 C17 H17 120.7 . . ? 
N8 C18 C15 117.2(7) . . ? 
N8 C18 N9 120.3(7) . . ? 
C15 C18 N9 120.4(8) . . ? 
N1 Cu1 S2 109.04(18) . 2_665 ? 
N1 Cu1 S1 107.39(18) . . ? 
S2 Cu1 S1 103.61(8) 2_665 . ? 
N1 Cu1 I1 100.98(18) . . ? 
S2 Cu1 I1 114.15(6) 2_665 . ? 
S1 Cu1 I1 121.18(6) . . ? 
N1 Cu1 W1 120.97(18) . . ? 
S2 Cu1 W1 52.09(5) 2_665 . ? 
S1 Cu1 W1 51.52(5) . . ? 
I1 Cu1 W1 137.96(4) . . ? 
N6 Cu2 N7 106.3(3) 14_556 . ? 
N6 Cu2 S1 111.7(2) 14_556 . ? 
N7 Cu2 S1 116.14(18) . . ? 
N6 Cu2 S2 118.7(2) 14_556 . ? 
N7 Cu2 S2 99.85(18) . . ? 
S1 Cu2 S2 104.11(8) . . ? 
N6 Cu2 W1 132.3(2) 14_556 . ? 
N7 Cu2 W1 121.20(16) . . ? 
S1 Cu2 W1 52.12(5) . . ? 
S2 Cu2 W1 52.02(5) . . ? 
C5 N1 C1 120.3(6) . . ? 
C5 N1 Cu1 120.5(5) . . ? 
C1 N1 Cu1 118.9(4) . . ? 
C6 N2 N3 121.7(6) . . ? 
C7 N3 N2 118.4(7) . . ? 
C7 N4 N5 118.1(6) . . ? 
C6 N5 N4 119.1(6) . . ? 
C10 N6 C11 119.1(7) . . ? 
C10 N6 Cu2 120.3(5) . 14_546 ? 
C11 N6 Cu2 120.4(6) . 14_546 ? 
C17 N7 C13 122.6(6) . . ? 
C17 N7 Cu2 125.9(5) . . ? 
C13 N7 Cu2 111.4(5) . . ? 
C18 N8 N8 119.7(4) . 3_657 ? 
N9 N9 C18 118.4(4) 3_657 . ? 
W1 S1 Cu2 73.79(6) . . ? 
W1 S1 Cu1 73.53(6) . . ? 
Cu2 S1 Cu1 115.21(9) . . ? 
W1 S2 Cu1 74.34(7) . 2_665 ? 
W1 S2 Cu2 72.80(6) . . ? 
Cu1 S2 Cu2 110.81(9) 2_665 . ? 
S1 W1 S1 109.48(11) . 2_665 ? 
S1 W1 S2 109.24(7) . . ? 
S1 W1 S2 108.51(7) 2_665 . ? 
S1 W1 S2 108.51(7) . 2_665 ? 
S1 W1 S2 109.24(7) 2_665 2_665 ? 
S2 W1 S2 111.84(10) . 2_665 ? 
S1 W1 Cu2 54.09(6) . . ? 
S1 W1 Cu2 122.65(6) 2_665 . ? 
S2 W1 Cu2 55.18(5) . . ? 
S2 W1 Cu2 128.07(5) 2_665 . ? 
S1 W1 Cu2 122.65(6) . 2_665 ? 
S1 W1 Cu2 54.09(6) 2_665 2_665 ? 
S2 W1 Cu2 128.07(5) . 2_665 ? 
S2 W1 Cu2 55.18(5) 2_665 2_665 ? 
Cu2 W1 Cu2 175.33(4) . 2_665 ? 
S1 W1 Cu1 125.24(6) . 2_665 ? 
S1 W1 Cu1 54.94(6) 2_665 2_665 ? 
S2 W1 Cu1 53.57(5) . 2_665 ? 
S2 W1 Cu1 126.25(5) 2_665 2_665 ? 
Cu2 W1 Cu1 88.47(3) . 2_665 ? 
Cu2 W1 Cu1 91.54(3) 2_665 2_665 ? 
S1 W1 Cu1 54.94(6) . . ? 
S1 W1 Cu1 125.24(6) 2_665 . ? 
S2 W1 Cu1 126.25(5) . . ? 
S2 W1 Cu1 53.57(5) 2_665 . ? 
Cu2 W1 Cu1 91.54(3) . . ? 
Cu2 W1 Cu1 88.47(3) 2_665 . ? 
Cu1 W1 Cu1 179.74(4) 2_665 . ? 
 
_diffrn_measured_fraction_theta_max    1.000 
_diffrn_reflns_theta_full              26.00 
_diffrn_measured_fraction_theta_full   1.000 
_refine_diff_density_max    0.909 
_refine_diff_density_min   -1.336 
_refine_diff_density_rms    0.157 

# === END

 
data_1' 
 
_audit_creation_method            SHELXL-97 
_chemical_name_systematic 
; 
 ? 
; 
_chemical_name_common             ? 
_chemical_melting_point           ? 
_chemical_formula_moiety           'C36 H24 Cu4 I2 N18 S4 W' 
_chemical_formula_sum 
 'C36 H24 Cu4 I2 N18 S4 W' 
_chemical_formula_weight          1528.85 
 
loop_ 
 _atom_type_symbol 
 _atom_type_description 
 _atom_type_scat_dispersion_real 
 _atom_type_scat_dispersion_imag 
 _atom_type_scat_source 
 'C'  'C'   0.0033   0.0016 
 'International Tables Vol C Tables 4.2.6.8 and 6.1.1.4' 
 'H'  'H'   0.0000   0.0000 
 'International Tables Vol C Tables 4.2.6.8 and 6.1.1.4' 
 'N'  'N'   0.0061   0.0033 
 'International Tables Vol C Tables 4.2.6.8 and 6.1.1.4' 
 'S'  'S'   0.1246   0.1234 
 'International Tables Vol C Tables 4.2.6.8 and 6.1.1.4' 
 'Cu'  'Cu'   0.3201   1.2651 
 'International Tables Vol C Tables 4.2.6.8 and 6.1.1.4' 
 'I'  'I'  -0.4742   1.8119 
 'International Tables Vol C Tables 4.2.6.8 and 6.1.1.4' 
 'W'  'W'  -0.8490   6.8722 
 'International Tables Vol C Tables 4.2.6.8 and 6.1.1.4' 
 
_symmetry_cell_setting            orthorhombic 
_symmetry_space_group_name_H-M    'Ccca' 
_symmetry_space_group_name_Hall   '-C 2b 2bc'
 
loop_ 
 _symmetry_equiv_pos_as_xyz 
 'x, y, z' 
 '-x+1/2, -y, z' 
 '-x, y, -z+1/2' 
 'x+1/2, -y, -z+1/2' 
 'x+1/2, y+1/2, z' 
 '-x+1, -y+1/2, z' 
 '-x+1/2, y+1/2, -z+1/2' 
 'x+1, -y+1/2, -z+1/2' 
 '-x, -y, -z' 
 'x-1/2, y, -z' 
 'x, -y, z-1/2' 
 '-x-1/2, y, z-1/2' 
 '-x+1/2, -y+1/2, -z' 
 'x, y+1/2, -z' 
 'x+1/2, -y+1/2, z-1/2' 
 '-x, y+1/2, z-1/2' 
 
_cell_length_a                    26.860(6) 
_cell_length_b                    31.492(7) 
_cell_length_c                    13.905(5) 
_cell_angle_alpha                 90.00 
_cell_angle_beta                  90.00 
_cell_angle_gamma                 90.00 
_cell_volume                      11762(6) 
_cell_formula_units_Z             8 
_cell_measurement_temperature     291(2) 
_cell_measurement_reflns_used     1024 
_cell_measurement_theta_min       2.473 
_cell_measurement_theta_max       25.931 


_exptl_crystal_description        BLOCK 
_exptl_crystal_colour             'dark red' 
_exptl_crystal_size_max           0.55 
_exptl_crystal_size_mid           0.46
_exptl_crystal_size_min           0.32 
_exptl_crystal_density_meas       ? 
_exptl_crystal_density_diffrn     1.727 
_exptl_crystal_density_method     'not measured' 
_exptl_crystal_F_000              5808 
_exptl_absorpt_coefficient_mu     4.604 
_exptl_absorpt_correction_type    'multi-scan' 
_exptl_absorpt_correction_T_min   0.091
_exptl_absorpt_correction_T_max   0.229
_exptl_absorpt_process_details    'SADABS; Bruker, 2000' 
 
_exptl_special_details 
; 
 ? 
; 
 
_diffrn_ambient_temperature       291(2) 
_diffrn_radiation_wavelength      0.71073 
_diffrn_radiation_type           'MoK\a'
_diffrn_radiation_source         'sealed tube'
_diffrn_radiation_monochromator  'graphite'
_diffrn_measurement_device_type  'Bruker Smart Apex CCD'
_diffrn_measurement_method       'phi and omega scans' 
_diffrn_detector_area_resol_mean  ? 
_diffrn_standards_number          ? 
_diffrn_standards_interval_count  ? 
_diffrn_standards_interval_time   ? 
_diffrn_standards_decay_%         ? 
_diffrn_reflns_number             27991 
_diffrn_reflns_av_R_equivalents   0.1340 
_diffrn_reflns_av_sigmaI/netI     0.0745 
_diffrn_reflns_limit_h_min        -29 
_diffrn_reflns_limit_h_max        32 
_diffrn_reflns_limit_k_min        -37 
_diffrn_reflns_limit_k_max        37 
_diffrn_reflns_limit_l_min        -14 
_diffrn_reflns_limit_l_max        16 
_diffrn_reflns_theta_min          1.77 
_diffrn_reflns_theta_max          25.05 
_reflns_number_total              5215 
_reflns_number_gt                 3712 
_reflns_threshold_expression      >2sigma(I) 
 
_computing_data_collection      'SMART (Bruker, 2000)'
_computing_cell_refinement      'SMART'
_computing_data_reduction       'SAINT (Bruker, 2000)'
_computing_structure_solution   'SHELXTL (Bruker, 2000)'
_computing_structure_refinement 'SHELXTL'
_computing_molecular_graphics   'SHELXTL'
_computing_publication_material 'SHELXTL'
 
_refine_special_details 
; 
 Refinement of F^2^ against ALL reflections.  The weighted R-factor wR and 
 goodness of fit S are based on F^2^, conventional R-factors R are based 
 on F, with F set to zero for negative F^2^. The threshold expression of 
 F^2^ > 2sigma(F^2^) is used only for calculating R-factors(gt) etc. and is 
 not relevant to the choice of reflections for refinement.  R-factors based 
 on F^2^ are statistically about twice as large as those based on F, and R- 
 factors based on ALL data will be even larger. 
; 
 
_refine_ls_structure_factor_coef  Fsqd  
_refine_ls_matrix_type            full 
_refine_ls_weighting_scheme       calc  
_refine_ls_weighting_details 
 'calc w=1/[\s^2^(Fo^2^)+(0.0900P)^2^+0.0000P] where P=(Fo^2^+2Fc^2^)/3' 
_atom_sites_solution_primary      direct 
_atom_sites_solution_secondary    difmap 
_atom_sites_solution_hydrogens    geom 
_refine_ls_hydrogen_treatment     constr 
_refine_ls_extinction_method      none 
_refine_ls_extinction_coef        ? 
_refine_ls_number_reflns          5215 
_refine_ls_number_parameters      294 
_refine_ls_number_restraints      300 
_refine_ls_R_factor_all           0.0839 
_refine_ls_R_factor_gt            0.0636 
_refine_ls_wR_factor_ref          0.1676 
_refine_ls_wR_factor_gt           0.1581 
_refine_ls_goodness_of_fit_ref    1.036 
_refine_ls_restrained_S_all       1.010 
_refine_ls_shift/su_max           0.000 
_refine_ls_shift/su_mean          0.000 

loop_
  _platon_squeeze_void_nr
  _platon_squeeze_void_average_x
  _platon_squeeze_void_average_y
  _platon_squeeze_void_average_z
  _platon_squeeze_void_volume
  _platon_squeeze_void_count_electrons
  _platon_squeeze_void_content
   1  0.000  0.000  0.000      1767       112 ' '
   2  0.500  0.227  0.210      1767       112 ' '

 
loop_ 
 _atom_site_label 
 _atom_site_type_symbol 
 _atom_site_fract_x 
 _atom_site_fract_y 
 _atom_site_fract_z 
 _atom_site_U_iso_or_equiv 
 _atom_site_adp_type 
 _atom_site_occupancy 
 _atom_site_symmetry_multiplicity 
 _atom_site_calc_flag 
 _atom_site_refinement_flags 
 _atom_site_disorder_assembly 
 _atom_site_disorder_group 
C1 C 0.1532(5) 0.3555(3) 0.2703(6) 0.070(3) Uani 1 1 d U . . 
H1 H 0.1377 0.3536 0.3299 0.084 Uiso 1 1 calc R . . 
C2 C 0.1532(5) 0.3194(3) 0.2122(7) 0.084(4) Uani 1 1 d U . . 
H2 H 0.1372 0.2947 0.2315 0.101 Uiso 1 1 calc R . . 
C3 C 0.1780(5) 0.3217(3) 0.1239(7) 0.072(3) Uani 1 1 d U . . 
C4 C 0.1982(4) 0.3605(3) 0.0981(6) 0.059(3) Uani 1 1 d U . . 
H4 H 0.2131 0.3636 0.0381 0.071 Uiso 1 1 calc R . . 
C5 C 0.1967(4) 0.3948(3) 0.1605(6) 0.054(2) Uani 1 1 d U . . 
H5 H 0.2118 0.4202 0.1423 0.064 Uiso 1 1 calc R . . 
C6 C 0.1804(5) 0.2843(3) 0.0602(7) 0.083(4) Uani 1 1 d U . . 
C7 C 0.1834(6) 0.2203(4) -0.0527(7) 0.088(4) Uani 1 1 d U . . 
C8 C 0.1821(5) 0.1837(3) -0.1205(7) 0.075(3) Uani 1 1 d U . . 
C9 C 0.1647(4) 0.1447(3) -0.0941(7) 0.069(3) Uani 1 1 d U . . 
H9 H 0.1525 0.1405 -0.0322 0.083 Uiso 1 1 calc R . . 
C10 C 0.1650(4) 0.1117(4) -0.1581(7) 0.067(3) Uani 1 1 d U . . 
H10 H 0.1524 0.0855 -0.1391 0.080 Uiso 1 1 calc R . . 
C11 C 0.2005(5) 0.1530(3) -0.2733(6) 0.080(4) Uani 1 1 d U . . 
H11 H 0.2126 0.1560 -0.3356 0.097 Uiso 1 1 calc R . . 
C12 C 0.2023(6) 0.1885(3) -0.2132(7) 0.092(4) Uani 1 1 d U . . 
H12 H 0.2161 0.2140 -0.2335 0.110 Uiso 1 1 calc R . . 
C13 C 0.3952(4) 0.3914(3) 0.4615(7) 0.056(2) Uani 1 1 d U . . 
H13 H 0.3914 0.3685 0.4199 0.067 Uiso 1 1 calc R . . 
C14 C 0.4287(4) 0.3875(3) 0.5365(7) 0.064(3) Uani 1 1 d U . . 
H14 H 0.4467 0.3626 0.5454 0.077 Uiso 1 1 calc R . . 
C15 C 0.4346(4) 0.4213(3) 0.5974(6) 0.054(2) Uani 1 1 d U . . 
C16 C 0.4067(4) 0.4586(4) 0.5817(6) 0.059(2) Uani 1 1 d U . . 
H16 H 0.4098 0.4823 0.6211 0.071 Uiso 1 1 calc R . . 
C17 C 0.3749(4) 0.4579(3) 0.5058(7) 0.060(2) Uani 1 1 d U . . 
H17 H 0.3562 0.4823 0.4950 0.072 Uiso 1 1 calc R . . 
C18 C 0.4692(3) 0.4203(3) 0.6794(7) 0.053(2) Uani 1 1 d U . . 
Cu1 Cu 0.17220(5) 0.44425(4) 0.34159(8) 0.0520(3) Uani 1 1 d U . . 
Cu2 Cu 0.31435(4) 0.43401(4) 0.34234(8) 0.0495(3) Uani 1 1 d U . . 
I1 I 0.09203(3) 0.43123(3) 0.43711(5) 0.0713(3) Uani 1 1 d U . . 
N1 N 0.1741(3) 0.3926(2) 0.2466(5) 0.0580(19) Uani 1 1 d U . . 
N2 N 0.1637(6) 0.2478(3) 0.0929(7) 0.121(5) Uani 1 1 d U . . 
N3 N 0.1643(5) 0.2147(3) 0.0353(7) 0.113(5) Uani 1 1 d U . . 
N4 N 0.2051(6) 0.2566(3) -0.0834(6) 0.108(4) Uani 1 1 d U . . 
N5 N 0.2033(5) 0.2896(3) -0.0243(6) 0.107(4) Uani 1 1 d U . . 
N6 N 0.1832(3) 0.1160(2) -0.2484(5) 0.0519(18) Uani 1 1 d U . . 
N7 N 0.3681(3) 0.4260(2) 0.4457(5) 0.0518(18) Uani 1 1 d U . . 
N8 N 0.4844(3) 0.3827(3) 0.7132(6) 0.062(2) Uani 1 1 d U . . 
N9 N 0.4836(3) 0.4580(3) 0.7125(6) 0.073(3) Uani 1 1 d U . . 
S1 S 0.24330(9) 0.44219(8) 0.43478(16) 0.0478(5) Uani 1 1 d U . . 
S2 S 0.31812(9) 0.49479(7) 0.25135(17) 0.0509(6) Uani 1 1 d U . . 
W1 W 0.2500 0.5000 0.34262(3) 0.03901(18) Uani 1 2 d SU . . 
 
loop_ 
 _atom_site_aniso_label 
 _atom_site_aniso_U_11 
 _atom_site_aniso_U_22 
 _atom_site_aniso_U_33 
 _atom_site_aniso_U_23 
 _atom_site_aniso_U_13 
 _atom_site_aniso_U_12 
C1 0.136(9) 0.048(5) 0.026(4) 0.001(4) 0.015(5) -0.013(6) 
C2 0.155(11) 0.048(6) 0.049(6) -0.001(4) 0.028(6) -0.022(7) 
C3 0.136(10) 0.042(5) 0.038(5) -0.001(4) 0.013(6) -0.006(6) 
C4 0.105(8) 0.044(5) 0.028(4) 0.002(3) 0.009(5) -0.004(5) 
C5 0.081(7) 0.036(4) 0.045(5) 0.003(4) -0.004(4) -0.012(4) 
C6 0.169(12) 0.048(5) 0.032(5) -0.006(4) 0.006(6) -0.024(7) 
C7 0.179(13) 0.048(5) 0.038(5) -0.007(4) 0.015(7) -0.007(7) 
C8 0.144(10) 0.042(5) 0.038(5) -0.007(4) 0.005(6) 0.004(6) 
C9 0.100(8) 0.054(5) 0.055(6) -0.013(4) 0.022(6) -0.010(6) 
C10 0.085(7) 0.056(6) 0.059(6) -0.014(4) 0.012(5) -0.008(6) 
C11 0.175(12) 0.046(5) 0.021(4) -0.003(4) 0.005(6) -0.003(6) 
C12 0.205(14) 0.030(5) 0.040(5) 0.003(4) 0.018(7) 0.005(7) 
C13 0.064(6) 0.048(5) 0.056(6) -0.011(4) -0.012(4) 0.008(4) 
C14 0.070(6) 0.061(6) 0.061(6) -0.005(5) -0.019(5) 0.007(5) 
C15 0.054(5) 0.066(6) 0.043(5) 0.001(4) -0.005(4) -0.003(4) 
C16 0.072(6) 0.061(6) 0.043(5) -0.005(4) -0.006(4) 0.001(5) 
C17 0.081(7) 0.054(5) 0.046(5) -0.004(4) -0.012(4) 0.010(5) 
C18 0.055(5) 0.061(5) 0.044(5) -0.005(4) -0.007(4) -0.006(4) 
Cu1 0.0706(7) 0.0407(6) 0.0448(7) -0.0011(5) -0.0060(5) -0.0021(5) 
Cu2 0.0690(7) 0.0398(6) 0.0397(6) -0.0025(5) -0.0034(5) 0.0074(5) 
I1 0.0716(5) 0.0735(5) 0.0686(5) -0.0024(4) 0.0008(4) -0.0054(4) 
N1 0.088(5) 0.049(4) 0.037(4) -0.002(3) 0.001(3) -0.009(4) 
N2 0.266(15) 0.046(5) 0.052(6) -0.013(4) 0.049(7) -0.028(8) 
N3 0.243(14) 0.045(5) 0.051(5) -0.014(4) 0.040(7) -0.029(7) 
N4 0.245(14) 0.049(5) 0.030(5) -0.006(4) 0.022(6) -0.019(7) 
N5 0.245(14) 0.045(5) 0.033(5) -0.004(4) 0.022(6) -0.021(7) 
N6 0.078(5) 0.037(4) 0.041(4) -0.007(3) -0.004(4) 0.003(4) 
N7 0.069(4) 0.044(4) 0.042(4) -0.005(3) -0.001(3) 0.007(3) 
N8 0.070(6) 0.065(5) 0.051(5) 0.003(4) -0.018(4) -0.007(4) 
N9 0.097(7) 0.058(5) 0.062(6) 0.004(4) -0.032(5) 0.001(5) 
S1 0.0621(14) 0.0456(13) 0.0355(11) 0.0101(9) -0.0022(10) 0.0042(10) 
S2 0.0740(15) 0.0417(13) 0.0371(11) -0.0033(9) 0.0126(10) 0.0049(11) 
W1 0.0599(3) 0.0308(3) 0.0263(3) 0.000 0.000 0.0032(2) 
 
_geom_special_details 
; 
 All esds (except the esd in the dihedral angle between two l.s. planes) 
 are estimated using the full covariance matrix.  The cell esds are taken 
 into account individually in the estimation of esds in distances, angles 
 and torsion angles; correlations between esds in cell parameters are only 
 used when they are defined by crystal symmetry.  An approximate (isotropic) 
 treatment of cell esds is used for estimating esds involving l.s. planes. 
; 
 
loop_ 
 _geom_bond_atom_site_label_1 
 _geom_bond_atom_site_label_2 
 _geom_bond_distance 
 _geom_bond_site_symmetry_2 
 _geom_bond_publ_flag 
C1 N1 1.336(12) . ? 
C1 C2 1.394(13) . ? 
C1 H1 0.9300 . ? 
C2 C3 1.399(14) . ? 
C2 H2 0.9300 . ? 
C3 C4 1.386(14) . ? 
C3 C6 1.475(14) . ? 
C4 C5 1.387(13) . ? 
C4 H4 0.9300 . ? 
C5 N1 1.345(11) . ? 
C5 H5 0.9300 . ? 
C6 N2 1.314(14) . ? 
C6 N5 1.338(14) . ? 
C7 N3 1.339(14) . ? 
C7 N4 1.352(15) . ? 
C7 C8 1.488(14) . ? 
C8 C9 1.365(15) . ? 
C8 C12 1.407(14) . ? 
C9 C10 1.369(14) . ? 
C9 H9 0.9300 . ? 
C10 N6 1.354(12) . ? 
C10 H10 0.9300 . ? 
C11 N6 1.301(12) . ? 
C11 C12 1.396(13) . ? 
C11 H11 0.9300 . ? 
C12 H12 0.9300 . ? 
C13 N7 1.329(11) . ? 
C13 C14 1.382(12) . ? 
C13 H13 0.9300 . ? 
C14 C15 1.368(14) . ? 
C14 H14 0.9300 . ? 
C15 C16 1.412(14) . ? 
C15 C18 1.472(12) . ? 
C16 C17 1.357(12) . ? 
C16 H16 0.9300 . ? 
C17 N7 1.320(12) . ? 
C17 H17 0.9300 . ? 
C18 N9 1.329(12) . ? 
C18 N8 1.338(12) . ? 
Cu1 N1 2.097(8) . ? 
Cu1 S2 2.308(3) 2_565 ? 
Cu1 S1 2.309(3) . ? 
Cu1 I1 2.5631(16) . ? 
Cu1 W1 2.7294(13) . ? 
Cu2 N6 2.047(7) 13 ? 
Cu2 N7 2.053(8) . ? 
Cu2 S2 2.297(3) . ? 
Cu2 S1 2.315(3) . ? 
Cu2 W1 2.7029(13) . ? 
N2 N3 1.316(13) . ? 
N4 N5 1.326(13) . ? 
N6 Cu2 2.047(7) 13 ? 
N8 N8 1.321(14) 3_656 ? 
N9 N9 1.365(15) 3_656 ? 
S1 W1 2.234(2) . ? 
S2 W1 2.233(2) . ? 
S2 Cu1 2.308(3) 2_565 ? 
W1 S2 2.233(2) 2_565 ? 
W1 S1 2.234(2) 2_565 ? 
W1 Cu2 2.7029(13) 2_565 ? 
W1 Cu1 2.7294(14) 2_565 ? 
 
loop_ 
 _geom_angle_atom_site_label_1 
 _geom_angle_atom_site_label_2 
 _geom_angle_atom_site_label_3 
 _geom_angle 
 _geom_angle_site_symmetry_1 
 _geom_angle_site_symmetry_3 
 _geom_angle_publ_flag 
N1 C1 C2 124.7(9) . . ? 
N1 C1 H1 117.6 . . ? 
C2 C1 H1 117.6 . . ? 
C1 C2 C3 117.8(10) . . ? 
C1 C2 H2 121.1 . . ? 
C3 C2 H2 121.1 . . ? 
C4 C3 C2 117.4(9) . . ? 
C4 C3 C6 122.1(9) . . ? 
C2 C3 C6 120.5(9) . . ? 
C3 C4 C5 120.9(8) . . ? 
C3 C4 H4 119.5 . . ? 
C5 C4 H4 119.5 . . ? 
N1 C5 C4 121.9(9) . . ? 
N1 C5 H5 119.0 . . ? 
C4 C5 H5 119.0 . . ? 
N2 C6 N5 124.7(10) . . ? 
N2 C6 C3 118.4(9) . . ? 
N5 C6 C3 116.7(9) . . ? 
N3 C7 N4 124.4(10) . . ? 
N3 C7 C8 117.9(10) . . ? 
N4 C7 C8 117.7(9) . . ? 
C9 C8 C12 118.3(9) . . ? 
C9 C8 C7 122.3(10) . . ? 
C12 C8 C7 119.2(10) . . ? 
C8 C9 C10 120.4(10) . . ? 
C8 C9 H9 119.8 . . ? 
C10 C9 H9 119.8 . . ? 
N6 C10 C9 121.9(10) . . ? 
N6 C10 H10 119.0 . . ? 
C9 C10 H10 119.0 . . ? 
N6 C11 C12 124.7(9) . . ? 
N6 C11 H11 117.6 . . ? 
C12 C11 H11 117.6 . . ? 
C11 C12 C8 116.7(10) . . ? 
C11 C12 H12 121.6 . . ? 
C8 C12 H12 121.6 . . ? 
N7 C13 C14 123.6(9) . . ? 
N7 C13 H13 118.2 . . ? 
C14 C13 H13 118.2 . . ? 
C15 C14 C13 118.3(10) . . ? 
C15 C14 H14 120.9 . . ? 
C13 C14 H14 120.9 . . ? 
C14 C15 C16 119.3(9) . . ? 
C14 C15 C18 122.5(10) . . ? 
C16 C15 C18 118.2(9) . . ? 
C17 C16 C15 116.1(9) . . ? 
C17 C16 H16 121.9 . . ? 
C15 C16 H16 121.9 . . ? 
N7 C17 C16 126.3(10) . . ? 
N7 C17 H17 116.8 . . ? 
C16 C17 H17 116.8 . . ? 
N9 C18 N8 125.3(8) . . ? 
N9 C18 C15 115.8(9) . . ? 
N8 C18 C15 118.9(9) . . ? 
N1 Cu1 S2 107.5(2) . 2_565 ? 
N1 Cu1 S1 108.2(2) . . ? 
S2 Cu1 S1 103.61(10) 2_565 . ? 
N1 Cu1 I1 102.9(2) . . ? 
S2 Cu1 I1 120.62(8) 2_565 . ? 
S1 Cu1 I1 113.55(8) . . ? 
N1 Cu1 W1 119.0(2) . . ? 
S2 Cu1 W1 51.80(6) 2_565 . ? 
S1 Cu1 W1 51.81(6) . . ? 
I1 Cu1 W1 138.02(5) . . ? 
N6 Cu2 N7 109.2(3) 13 . ? 
N6 Cu2 S2 106.8(2) 13 . ? 
N7 Cu2 S2 117.2(2) . . ? 
N6 Cu2 S1 117.8(2) 13 . ? 
N7 Cu2 S1 101.8(2) . . ? 
S2 Cu2 S1 104.45(9) . . ? 
N6 Cu2 W1 127.8(2) 13 . ? 
N7 Cu2 W1 122.9(2) . . ? 
S2 Cu2 W1 52.29(6) . . ? 
S1 Cu2 W1 52.17(6) . . ? 
C1 N1 C5 117.1(8) . . ? 
C1 N1 Cu1 120.8(6) . . ? 
C5 N1 Cu1 122.1(6) . . ? 
C6 N2 N3 118.6(9) . . ? 
N2 N3 C7 117.2(10) . . ? 
N5 N4 C7 116.9(9) . . ? 
N4 N5 C6 117.6(10) . . ? 
C11 N6 C10 117.8(8) . . ? 
C11 N6 Cu2 120.5(6) . 13 ? 
C10 N6 Cu2 121.7(7) . 13 ? 
C17 N7 C13 116.3(8) . . ? 
C17 N7 Cu2 116.6(6) . . ? 
C13 N7 Cu2 127.0(6) . . ? 
N8 N8 C18 117.8(5) 3_656 . ? 
C18 N9 N9 116.9(5) . 3_656 ? 
W1 S1 Cu1 73.84(7) . . ? 
W1 S1 Cu2 72.89(8) . . ? 
Cu1 S1 Cu2 111.92(11) . . ? 
W1 S2 Cu2 73.26(8) . . ? 
W1 S2 Cu1 73.87(7) . 2_565 ? 
Cu2 S2 Cu1 113.49(11) . 2_565 ? 
S2 W1 S2 110.72(13) 2_565 . ? 
S2 W1 S1 109.40(9) 2_565 2_565 ? 
S2 W1 S1 108.67(9) . 2_565 ? 
S2 W1 S1 108.67(9) 2_565 . ? 
S2 W1 S1 109.40(9) . . ? 
S1 W1 S1 109.98(13) 2_565 . ? 
S2 W1 Cu2 54.45(6) 2_565 2_565 ? 
S2 W1 Cu2 125.43(6) . 2_565 ? 
S1 W1 Cu2 54.95(7) 2_565 2_565 ? 
S1 W1 Cu2 125.17(7) . 2_565 ? 
S2 W1 Cu2 125.43(6) 2_565 . ? 
S2 W1 Cu2 54.45(6) . . ? 
S1 W1 Cu2 125.17(7) 2_565 . ? 
S1 W1 Cu2 54.95(7) . . ? 
Cu2 W1 Cu2 179.83(5) 2_565 . ? 
S2 W1 Cu1 125.25(7) 2_565 2_565 ? 
S2 W1 Cu1 54.33(7) . 2_565 ? 
S1 W1 Cu1 54.34(7) 2_565 2_565 ? 
S1 W1 Cu1 126.08(7) . 2_565 ? 
Cu2 W1 Cu1 89.71(5) 2_565 2_565 ? 
Cu2 W1 Cu1 90.28(5) . 2_565 ? 
S2 W1 Cu1 54.33(7) 2_565 . ? 
S2 W1 Cu1 125.25(7) . . ? 
S1 W1 Cu1 126.08(7) 2_565 . ? 
S1 W1 Cu1 54.34(7) . . ? 
Cu2 W1 Cu1 90.28(5) 2_565 . ? 
Cu2 W1 Cu1 89.71(5) . . ? 
Cu1 W1 Cu1 179.40(5) 2_565 . ? 
 
_diffrn_measured_fraction_theta_max    0.999 
_diffrn_reflns_theta_full              25.05 
_diffrn_measured_fraction_theta_full   0.999 
_refine_diff_density_max    3.344 
_refine_diff_density_min   -1.131 
_refine_diff_density_rms    0.209 


# === END
